# Supplementary material for: Patterns and Predictors of Healthcare Use among Adolescent and Young Adult Cancer Survivors versus a Community Comparison Group
Source: MDPI journal article supplement (doi:10.3390/cancers13215270), 2021-10-20
Supplement: s1 [file s1]

## SUPPLEMENTARY MATERIALS

**TABLE S1. Proportion of AYAs who reported having accessed mental healthcare services according to participant group and DASS-21 symptom score severity**

|                                     |                   | Cancer survivors<br>(n=93) |                             | Comparisons<br>(n=183)      |                             | Total<br>(N=276)            |                             | TOTAL<br>USE  |
|-------------------------------------|-------------------|----------------------------|-----------------------------|-----------------------------|-----------------------------|-----------------------------|-----------------------------|---------------|
| Service was<br>accessed             | DASS-21<br>Scores | Low <sup>1</sup><br>(n=83) | High <sup>2</sup><br>(n=10) | Low <sup>1</sup><br>(n=149) | High <sup>2</sup><br>(n=34) | Low <sup>1</sup><br>(n=232) | High <sup>2</sup><br>(n=44) | (N=276)       |
| <b>Overall<br/>mental HCU</b>       | N<br>(%)          | 41<br>(49.4%)              | 8<br>(80.0%)                | 27<br>(18.1%)               | 16<br>(47.1%)               | 68<br>(29.3%)               | 24<br>(54.5%)               | 92<br>(33.3%) |
| <b>Psychologist</b>                 | N<br>(%)          | 27<br>(32.5%)              | 6<br>(60.0%)                | 22<br>(14.8%)               | 8<br>(23.5%)                | 49<br>(21.1%)               | 14<br>(31.8%)               | 63<br>(22.8%) |
| <b>Psychiatrist</b>                 | N<br>(%)          | 8<br>(9.6%)                | 2<br>(20.0%)                | 11<br>(7.4%)                | 3<br>(8.8%)                 | 19<br>(8.2%)                | 5<br>(11.4%)                | 24<br>(8.7%)  |
| <b>Social worker</b>                | N<br>(%)          | 27<br>(32.5%)              | 5<br>(50.0%)                | 12<br>(8.1%)                | 2<br>(5.9%)                 | 39<br>(16.8%)               | 7<br>(15.9%)                | 46<br>(16.7%) |
| <b>Counsellor</b>                   | N<br>(%)          | 16<br>(19.3%)              | 2<br>(20.0%)                | 19<br>(12.8%)               | 7<br>(20.6%)                | 35<br>(15.1%)               | 9<br>(20.5%)                | 44<br>(15.9%) |
| <b>GP</b>                           | N<br>(%)          | 28<br>(34.1%)              | 4<br>(40.0%)                | 50<br>(33.6%)               | 15<br>(44.1%)               | 78<br>(33.8%)               | 19<br>(43.2%)               | 97<br>(35.3%) |
| <b>Psychotropic<br/>medications</b> | N<br>(%)          | 8<br>(9.6%)                | 3<br>(30.0%)                | 4<br>(2.7%)                 | 6<br>(17.6%)                | 12<br>(5.2%)                | 9<br>(20.5%)                | 21<br>(7.6%)  |

DASS-21=Depression, Anxiety, Stress Scales-Short Form. Low<sup>1</sup>= where AYAs scored in the normal-mild range of symptoms for both their DASS-21 depression and anxiety subscale scores; High<sup>2</sup>= where AYAs scored in the moderate, severe or extremely severe ranges for either or both their DASS-21 depression and anxiety subscale scores. HCU=Healthcare Use. GP=General Practitioner

**TABLE S2. Patterns of psychotropic medication use reported by adolescents and young adults, according to other forms of mental healthcare services they reported accessing**

|                               |                                   | Cancer survivors<br>(n=93) |               | Comparisons<br>(n=183) |               | Total<br>(N=276) |               | SIG^                         |
|-------------------------------|-----------------------------------|----------------------------|---------------|------------------------|---------------|------------------|---------------|------------------------------|
| Service use                   | Psychotropic<br>medication<br>use | No<br>(n=82)               | Yes<br>(n=11) | No<br>(n=173)          | Yes<br>(n=10) | No<br>(n=255)    | Yes<br>(n=21) |                              |
| <b>Overall<br/>mental HCU</b> | N<br>(%)                          | 41<br>(50.0%)              | 8<br>(72.7%)  | 35<br>(20.2%)          | 8<br>(80.0%)  | 76<br>(29.8%)    | 16<br>(76.2%) | $\chi^2=18.787$ ,<br>p<.0001 |
| <b>Psychologist</b>           | N<br>(%)                          | 27<br>(32.9%)              | 6<br>(54.5%)  | 23<br>(13.3%)          | 7<br>(70.0%)  | 50<br>(19.6%)    | 13<br>(61.9%) | $\chi^2=19.705$ ,<br>p<.0001 |
| <b>Psychiatrist</b>           | N<br>(%)                          | 7<br>(8.5%)                | 3<br>(27.3%)  | 10<br>(5.8%)           | 4<br>(40.0%)  | 17<br>(6.7%)     | 7<br>(33.3%)  | $\chi^2=17.378$ ,<br>p<.0001 |
| <b>GP</b>                     | N<br>(%)                          | 24<br>(29.3%)              | 8<br>(72.3%)  | 55<br>(31.8%)          | 10<br>(100%)  | 79<br>(31.0%)    | 18<br>(85.7%) | $\chi^2=25.338$ ,<br>p<.0001 |

SIG=Significance of chi-square test across overall sample.

**TABLE S3. Multivariable linear regressions examining relationships between healthcare use (HCU) and general functioning outcomes**

|                                                             |                                           | <i>B</i>     | <i>SE B</i> | <i>t</i>      | <i>p</i>    | <i>F</i>     |
|-------------------------------------------------------------|-------------------------------------------|--------------|-------------|---------------|-------------|--------------|
| <b>Perceived health-related quality of life<sup>a</sup></b> |                                           |              |             |               | <b>.008</b> | <b>2.977</b> |
| <b>Sociodemographic predictors</b>                          | Sex                                       | .069         | .194        | 0.357         | .722        | -            |
|                                                             | Employment status                         | .331         | .296        | 1.117         | .267        | -            |
|                                                             | LOTE                                      | .432         | .285        | 1.516         | .133        | -            |
| <b>Cancer-related predictors</b>                            | Age at diagnosis                          | .012         | .028        | 0.446         | .657        | -            |
|                                                             | <b>Diagnosis (Blood cancer vs. other)</b> | <b>-.408</b> | <b>.196</b> | <b>-2.078</b> | <b>.041</b> | -            |
|                                                             | Time since treatment                      | .002         | .002        | 0.799         | .427        | -            |
| <b>Overall HCU</b>                                          | <b>Total number of services used</b>      | <b>-.084</b> | <b>.033</b> | <b>-2.558</b> | <b>.012</b> |              |
| <b>Work and study engagement<sup>b</sup></b>                |                                           |              |             |               | <b>.001</b> | <b>4.066</b> |
| <b>Sociodemographic predictors</b>                          | Sex                                       | .169         | .075        | 2.252         | .027        | -            |
|                                                             | LOTE                                      | .000         | .108        | -0.001        | .999        | -            |
| <b>Cancer-related predictors</b>                            | Age at diagnosis                          | .009         | .011        | 0.833         | .407        | -            |
|                                                             | Diagnosis (Blood cancer vs. other)        | -.131        | .076        | -1.725        | .088        | -            |
|                                                             | Time since treatment                      | .001         | .001        | 1.577         | .119        | -            |
| <b>Overall HCU</b>                                          | <b>Total number of services used</b>      | <b>-.029</b> | <b>.013</b> | <b>-2.256</b> | <b>.027</b> |              |

Note. a) Perceived health-related quality of life: higher scores reflected poorer perceived health-status; b) Work and study engagement refers to number of self-reported days engaged in either work and/or study during the past four weeks. Age at diagnosis coded in years; Time since treatment completion coded in months.
